# Supplementary material
Source: publisher figshare collection journal article supplement (https://karger.figshare.com/ndownloader/files/13051325)
Supplement: Supplementary file 1 [file 13051325]

**Supplementary data**

**sTable 1**

| Gene | Forward Primer | Reverse Primer | Amplicon Size (bp) |
| --- | --- | --- | --- |
| **Degenerate Primer Sequence** | | | |
| *Foxl2* | DCSCAGAARCCMCCSTACTC | TAGTTGCCCTTKCGCTCRCC | 227 |
| *Aromatase* | GATGATGATHGCTGCHCCBG | TGCACAGARCMGWGGDGATC | 1100 |
| **Gene specific primers** | | | |
| *CvFoxl2* | CCAGTACATCATCGGCAAGTT | GGCACCTTGATGAAGCACTC | 105 |
| *CvRspo1* | GGTCCTCCCTCTCTGCTTCTTC | CCTCCTTCCGCTCACCTT | 233 |
| *CvSox9* | CCGTCAGCCAGTTCTTGAAG | TTCTCCTCCGTGGCTGATAC | 312 |
| *CvArom* | ACGCAGGATTTCCACAGAAG | TAGGGTGCTTTGCAATGAGA | 191 |
| *CvWnt4* | CAACTGGCTGTACCTGGCCAA | GAAGGCTACGCCATAGGCGAT | 427 |
| *CvßActin* | CGACTTGACCGACTACCTCA | TCGTAGCTCTTCTCCAGGGA | 174 |

**sTable 2**

| **CvActin**  940C- 5min  940C-30 Sec  600C-40 Sec 35 Cycles  720C-4 0Sec  720C-10min | **CvFoxl2**  940C- 5min  940C-30 Sec  600C-30 Sec 40 Cycles  720C-30Sec  720C-10min | **CvRspo1**  940C- 5min  940C-30 Sec  600C-1min 40 Cycles  720C-1min  720C-10min |
| --- | --- | --- |
| **CvWnt4**  940C- 5min  940C-30 Sec  600C-1min 40 Cycles  720C-1min  720C-10min | **CvArom**  940C- 5min  940C-30 Sec  560C-40 Sec 40 Cycles  720C-40Sec  720C-10min | **CvSox9**  940C- 5min  940C-35 Sec  550C-35 Sec 40 Cycles  720C-35Sec  720C-10min |

**S Figure 1**

**Probe Sequences:**

**CvFoxl2**

ACGCAGAAGCCACCCTACTCGTACGTGGCGCTGATCGAAAGGCCATCCGCGAGAGCGCCGAGAAGCGGCTGACGCTGTCGGGCATCTACCAGTACATCATCGGCAAGTTCCCCTTCTACGAGAAGAACAAGAAGGGCGGGCAGAACAGCATCCGCCACAACCTGAGCCTCAACGAGTGCTTCATCAAGGTGCCGCGAGAGGGCGGCGGCGAGCGAAAGGGCAACTAA

**mRspo1 (Riboprobe)**

ATTCTGCTGGAGAGGAACGACATCCGCCAGGTGGGCGTCTGCCTGCCGTCCTGCCCACCTGGATACTTTGATGCCCGCAACCCCGACATGAACAAATGCATCAAATGCAAGATCGAGCACTGTGAGGCCTGCTTCAGCCACAACTTCTGCACCAAGTGTCAGGAGGCCTTGTACTTACACAAGGGCCGCTGCTATCCAGCCTGCCCTGAGGGCTCTACAGCCGCTAACAGCACCATGGAGTGCGGCAGTCCTGCACAATGTGAAATGAGCGAGTGGTCCCCGTGGGGACCCTGCTCCAAGAAGAGGAAGCTGTGCGGTTTCCGGAAGGGATCGGAAGAGCGGACACGCAGAGTGCTCCATGCTCCCGGGGGAGACCACACCACCTGCTCCGACACCAAAGAGACCCGCAAGTGTACCGTGCGCAGGACGCCCTGCCCAGAGGGGCAGAAGAGGAGGAAGGGGGGCCAGGGCCGGAGGGAGAATGCCAACAGGCATCCGGCCAGGAAGAACAGCAAGGAGCCGAGGTCCAACTCTCGGAGACACAAAGGGCAACAGCAGCCACAGCCAGGGACAACAGGGCCACTCACATCAGTAGGACCTACCTGGGCACAGTGACCGGTCTCCAGATACCTGTGGAAGAGTACAGTGCTGTACTGTATAATGAGAACTTTCCAGAACTGGAGCATCTGGGAGAGTCCACACATACCCCATCCACCCACCCATCCAACTATCCATCCATCCATCCATGCACACATATGGCCACATCTGAAAACGTCAACACACACACACACACACACACACACACACACACACATTCTTGAGGTCACTGAAGACACTTCTATTCTGTGGCCCAGCTGTATATTCAGTCTTTAATGCTCTTGGAAGACATATCTGAGAGAACCTTTCCCAGCATCTGAAACTAAGGAGTGGAACCTTCTGGAGGAACTTCTGGGACAGCATCTGACAG

**CvRspo1**

GGTCCTCCCTCTGCTTCTTCCTCCCGCAGCCCAATGTGAGATGAGCGAGTGGGGGCCCTAGGGGCCCTGCTCCAAGAGGAGGAGGCAGTGCGGCTTCCGGAAGGGCAACGAGGAGCGCGCCCGGACGGTCCTGCAGGTGCTCTCGGGAGAGGCGCCTGCCTGCCCGCCCACCACCGAGTCCCGGAGATGCACCGTGCAGAGACGCCCGTGTCCGGAAGGTGAGCGGAAGGAGG

**CvAromatase**

GGCAAGCTCTCCTCATCAAACCAGACATCTTCTTTAAGATTTCTTGGCTATACAAAAAGCATGAGAAGTCTGTCAAGGATTTGAAAGATGCCATAGAAGTTCTGATAGCAGAAAAAAGACGCAGGATTTCCACAGAAGAGAAACTGGAAGAATGTATGGACTTTGCCACTGAGTTGATTTTAGCAGAGAAACGTGGTGACCTGACAAGAGAGAATGTGAACCAGTGCATATTGGAAATGCTGATCGCAGCTCCTGACACCATGTCTGTCTCTTTGTTCTTCATGCTATTTCTCATTGCAAAGCACCCTAATGTTGAAGAGGCAATAATAAAGGAAATCCAGACTGTTATTGGTGAGAGAGACATAAAGATTGATGATATACAAAAATTAAAAGTGATGGAAAACTTCATTTATGAGAGCATGCGGTACCGGCCTGTCGTGGACTTGGTCATGCGCAAAGCCTTAGAAGATGATGTAATCGATGGCTACCCAGTGAAAAAGGGGACAAACATTATCCTGAATATTGGAAGGATGCACAGACTCGAGTT

**S Figure 2 Nucleotide sequence alignment of different genes**

***2a. CvFoxl2***

Homo GCGG------------------CGGGAC---AGCCCCGGAGAAGCCGGACCCGGCGCAGA

Mus ----------------------CGGGAC---AACACCGGAGAAACCAGACCCCGCGCAGA

Gallus -----------------------GGC---------CCCGAGAAGCCGGACCCGTCGCAGA

Chrysemys -----------------------GGG---------GCCGAGAAGCCGGACCCCTCTCAGA

Alligator -----------------------GGC---------GCCGACAAGCCGGACCCGTCGCAGA

Danio -----------------------GGG---------CCGGACAAATCCGACCCGACCCAGA

Anolis CCTCTTCCTCGTCCTCTGTCTCGGCGGC---GGCGGCGGAGAAAGGCGACCCTTCGCAGA

Gekko GAGC-----CGGCGGCGGCGGCG-CCTC---GTCGTCGGAGAAGGGCGACCCGTCGCAGA

Calotes -----------------------------------------------------ACGCAGA

Pogona CCTCGGCCGTGGCGGCGGCGGCGGCGGCCGCGTCGTCGGAGAAAGGCGACCCTTCGCAGA

* ****

Homo AGCCCCCGTACTCGTACGTGGCGCTCATCGCCATGGCGATCCGCGAGAGCGCGGAGAAGA

Mus AGCCCCCGTACTCGTACGTGGCGCTCATCGCCATGGCGATCCGCGAGAGCGCCGAGAAGA

Gallus AGCCCCCCTACTCCTACGTGGCCCTGATCGCCATGGCCATACGGGAGAGCGCCGAGAAGA

Chrysemys AGCCCCCCTACTCCTACGTAGCTCTGATCGCCATGGCCATCCGGGAGAGCGCCGAGAAGC

Alligator AGCCGCCCTACTCGTACGTGGCGCTGATCGCCATGGCCATCCGCGAGAGCGCCGAGAAGC

Danio AACCACCGTACTCATACGTGGCGTTAATCGCGATGGCAATCCGCGAGAGCTCGGAGAAGC

Anolis AGCCTCCCTACTCCTACGTGGCCCTGATCGCCATGGCCATCCGCGAGAGCACCGAGAAGC

Gekko AACCGCCCTACTCGTACGTGGCGCTGATCGCCATGGCCATCCGCGAGAGCGCCGAGAAGC

Calotes AGCCACCCTACTCGTACGTGGCGCTGATCG-AAAGGCCATCCGCGAGAGCGCCGAGAAGC

Pogona AGCCGCCCTACTCGTACGTGGCGCTGATCGCCATGGCCATCCGCGAGAGCGCCGAGAAGC

* ** ** ***** ***** ** * **** * *** ** ** ****** * ******

Homo GGCTCACGCTGTCCGGCATCTACCAGTACATCATCGCGAAGTTCCCGTTCTACGAGAAGA

Mus GGCTCACTCTGTCCGGCATCTACCAGTACATCATAGCCAAGTTCCCGTTCTACGAGAAGA

Gallus GGCTCACGCTGTCCGGGATCTACCAGTACATCATCAGCAAGTTCCCTTTCTACGAGAAGA

Chrysemys GGCTCACGCTGTCCGGCATCTACCAGTACATCATCAGCAAGTTCCCCTTCTACGAGAAGA

Alligator GGCTCACGCTGTCGGGCATCTACCAGTACATCATCAGCAAGTTCCCCTTCTACGAGAAGA

Danio GTCTTACGCTGTCCGGTATATACCAGTACATCATCAGTAAGTTTCCATTCTACGAGAAGA

Anolis GCCTCACGCTGTCGGGCATCTACCAGTACATCATCGGCAAGTTCCCTTTCTACGAGAAGA

Gekko GGCTGACGCTGTCGGGCATCTACCAGTACATCATCGGCAAGTTCCCCTTCTACGAGAAGA

Calotes GGCTGACGCTGTCGGGCATCTACCAGTACATCATCGGCAAGTTCCCCTTCTACGAGAAGA

Pogona GGCTGACCCTGTCGGGCATCTACCAGTACATCATCAGCAAGTTCCCTTTCTACGAGAAGA

* ** ** ***** ** ** ************** ***** ** *************

Homo ATAAGAAGGGCTGGCAAAATAGCATCCGCCACAACCTCAGCCTCAACGAGTGCTTCATCA

Mus ACAAGAAGGGCTGGCAGAATAGCATCCGCCACAACCTCAGCCTCAACGAGTGCTTCATCA

Gallus ACAAGAAGGGCTGGCAGAACAGCATCCGCCACAACCTCAGCCTCAACGAGTGCTTCATCA

Chrysemys ACAAGAAGGGCTGGCAGAACAGCATCCGCCACAACCTGAGCCTCAACGAGTGCTTCATCA

Alligator ACAAGAAGGGCTGGCAGAACAGCATCCGCCACAACCTCAGCCTCAACGAGTGCTTCATCA

Danio ACAAGAAGGGATGGCAGAACAGCATCCGACACAACCTGTCACTCAACGAGTGCTTCATCA

Anolis ACAAGAAGGGCTGGCAGAACAGCATCCGGCACAACCTGAGCCTCAACGAGTGCTTCATCA

Gekko ACAAGAAGGGCTGGCAGAACAGCATCCGCCACAACCTGAGCCTCAACGAGTGCTTCATCA

Calotes ACAAGAAGGGCGGGCAGAACAGCATCCGCCACAACCTGAGCCTCAACGAGTGCTTCATCA

Pogona ACAAGAAGGGCTGGCAGAACAGCATCCGCCACAACCTGAGCCTCAACGAGTGCTTCATCA

* ******** **** ** ******** ******** *******************

Homo AGGTGCCGCGCGAGGGCGGCGGCGAGCGCAAGGGCAACTACTGGACGCTGGACCCGGCCT

Mus AGGTGCCGCGCGAGGGCGGCGGCGAGCGCAAGGGCAACTACTGGACGCTCGACCCGGCCT

Gallus AGGTGCCCCGCGAGGGCGGCGGCGAGCGCAAGGGCAACTACTGGACGCTGGACCCCGCCT

Chrysemys AGGTGCCCCGCGAGGGGGGCGGCGAGCGCAAGGGCAACTACTGGACACTGGACCCGGCCT

Alligator AGGTGCCCCGCGAGGGCGGCGGCGAGCGCAAGGGCAACTACTGGACGCTGGACCCCGCCT

Danio AGGTGCCTCGGGAGGGCGGCGGTGAGCGAAAGGGCAACTACTGGACCCTGGATCCTGCAT

Anolis AGGTGCCGCGCGAGGGCGGCGGGGAGCGCAAGGGCAACTACTGGACGCTGGACCCGGCCT

Gekko AGGTGCCGCGAGAGGGCGGCGGGGAGCGCAAAGGCAACTACTGGACCCTCGACCCGGCCT

Calotes AGGTGCCGCGAGAGGGCGGCGGCGAGCGAAAGGGCAACTA--------------------

Pogona AGGTGCCGCGAGAGGGCGGCGGAGAGCGCAAAGGCAACTACTGGACCCTCGACCCGGCCT

******* ** ***** ***** ***** ** ********

**2b. *CvArom***

Gallus CTTTGATGCTTGGCAAGCTCTTCTATTAAAGCCCGACATATTTTTTAAGATTTCTTGGCT

Pogona CTTTGACGCTTGGCAGGCCCTCCTGCTGAAACCCGACATCTTCTTCAAGTTTTCTTGGCT

Anolis CTTTGATGCCTGGCAGGCACTTCTGCTGAAACCCGATATCTTCTTTAAGTTTTCTTGGCT

Calotes -----------GGCAAGCTCTCCTCATCAAACCAGACATCTTCTTTAAGATTTCTTGGCT

Homo TTTTGATGCATGGCAAGCTCTCCTCATCAAACCAGACATCTTCTTTAAGATTTCTTGGCT

Mus CTTTAACGCCTGGCAAGCTCTCCTCATCAAACCAAACATCTTCTTTAAGATTTCTTGGCT

**** ** ** ** * ** ** * ** ** ** *** **********

Gallus TTGCAAGAAGTATGAAGAGGCAGCCAAAGACTTGAAAGGAGCAATGGAAATCTTAATAGA

Pogona GTACAGGAAATACGAGAAGTCTGCGAATGACTTGAAGGAGGCCATTGAAGTCTTGATCCA

Anolis GTACAAGAAATACGAAAAGTCCGCGAACGATCTGAAAGAAGCCATCGAGGACCTAATAGA

Calotes ATACAAAAAGCATGAGAAGTCTGTCAAGGATTTGAAAGATGCCATAGAAGTTCTGATAGC

Homo ATACAAAAAGTATGAGAAGTCTGTCAAGGATTTGAAAGATGCCATAGAAGTTCTGATAGC

Mus CTACAGAAAGTATGAACGATCCGTCAAGGACTTGAAAGACGAGATAGCTGTTTTGGTGGA

* ** ** * ** * * ** ** **** * * ** * * *

Gallus ACAGAAACGACAAAAGCTTTCCACTGTTGAAAAGTTGGATGAGCACATGGATTTTGCATC

Pogona GCAGAAGCGGCAGAAGCTTTCCCTGCTGGAGAAACTGGAGGAGCCCATGGATTTCACCTC

Anolis GCAGAAGCGGCAAAAGCTTTCCACGATTGACAAACTGGAGGACCATATGGATTTTGCATC

Calotes AGAAAAAAGACGCAGGATTTCCACAGAAGAGAAACTGGAAGAATGTATGGACTTTGCCAC

Homo AGAAAAAAGACGCAGGATTTCCACAGAAGAGAAACTGGAAGAATGTATGGACTTTGCCAC

Mus AAAGAAGAGACACAAAGTTTCCACAGCTGAGAAACTGGAAGACTGTATGGATTTTGCAAC

* ** * * * ***** ** ** **** ** ***** ** * *

Gallus TCAGCTGATTTTTGCACAGAACAGAGGAGATCTGACTGCTGAGAATGTGAACCAGTGTGT

Pogona CCAGCTGATTTTTGCACAGAGCCGTGGGGAACTCACCGGTGAGAATGTAAACCAGTGTGT

Anolis CCAGTTGATTTTTGCGCAGAGCCGCGGGGAGCTGACTGCTGAGAACGTCAACCAGTGCGT

Calotes TGAGTTGATTTTAGCAGAGAAACGTGGTGACCTGACAAGAGAGAATGTGAACCAGTGCAT

Homo TGAGTTGATTTTAGCAGAGAAACGTGGTGACCTGACAAGAGAGAATGTGAACCAGTGCAT

Mus TGATTTGATTTTCGCTGAGAGACGTGGAGACCTGACGAAAGAGAACGTGAATCAGTGCAT

* ******* ** *** * ** ** ** ** ***** ** ** ***** *

Gallus GCTGGAGATGATGATTGCTGCTCCTGATACTCTGTCCGTGACACTCTTCATTATGCTAAT

Pogona TCTGGAGATGCTGATTGCTGCCCCTGATACTCTCTCCGTGACACTGTTTTTCATGCTGGT

Anolis TTTGGAGATGCTCATCGCTGCCCCGGACACCCTTTCGGTCACTCTGTTCTTCATGCTGGT

Calotes ATTGGAAATGCTGATCGCAGCTCCTGACACCATGTCTGTCTCTTTGTTCTTCATGCTATT

Homo ATTGGAAATGCTGATCGCAGCTCCTGACACCATGTCTGTCTCTTTGTTCTTCATGCTATT

Mus ACTGGAGATGCTGATTGCAGCCCCTGACACCATGTCGGTCACTCTGTACTTCATGTTACT

**** *** * ** ** ** ** ** ** * ** ** * * * * *** * *

Gallus ACTGATTGCAGAGCACCCCACAGTGGAGGAGAAGATGATGAGAGAAATTGAAACTGTTAT

Pogona GCTAATTGCAGAACACCCTCAGGTGGAAGACGCAATGATGAAGGAAATACAGGCACAGAT

Anolis GCTGATCGCAGAGCACCCCCAAGTCGAAGAGGCCATGATGAAGGAAATACAGACCGTGAT

Calotes TCTCATTGCAAAGCACCCTAATGTTGAAGAGGCAATAATAAAGGAAATCCAGACTGTTAT

Homo TCTCATTGCAAAGCACCCTAATGTTGAAGAGGCAATAATAAAGGAAATCCAGACTGTTAT

Mus TCTCGTCGCAGAGTATCCAGAGGTCGAAGCAGCAATCCTGAAGGAGATCCACACTGTTGT

** * *** * * ** ** ** * ** * * ** ** * * *

Gallus GGGTGACAGAGATGTACAGAGTGATGACATGCCAAACCTCAAAATTGTGGAGAATTTTAT

Pogona AGGTAACAGGGAGATCCAAGGTGAGGACATGCCCAAACTTAAAGTGGTGGAGAATTTTAT

Anolis AAGTGACAGAGACATCCAAAGCGAGGACATGCCGAAGCTGAAGGTGGTTGAGAATTTCAT

Calotes TGGTGAGAGAGACATAAAGATTGATGATATACAAAAATTAAAAGTGATGGAAAACTTCAT

Homo TGGTGAGAGAGACATAAAGATTGATGATATACAAAAATTAAAAGTGATGGAAAACTTCAT

Mus GGGTGACAGAGACATAAAGATCGAGGATATCCAAAATTTAAAAGTGGTGGAAAACTTCAT

** * ** ** * * ** ** ** * ** * ** * * ** ** ** **

Gallus TTATGAGAGCATGAGATACCAGCCAGTTGTGGACTTAATCATGAGAAAAGCTTTACAAGA

Pogona CCTCGAGAGCATGAGATACCAGCCGGTGGTGGACCTGGTCATGCGCAAAGCCTTGCGGGA

Anolis TCTGGAGAGCATGAGATACCAGCCGGTCGTGGACTTGGTCATGCGCAAAGCTCTGCAAGA

Calotes TTATGAGAGCATGCGGTACCGGCCTGTCGTGGACTTGGTCATGCGCAAAGCCTTAGAAGA

Homo TTATGAGAGCATGCGGTACCAGCCTGTCGTGGACTTGGTCATGCGCAAAGCCTTAGAAGA

Mus TAATGAAAGCATGCGGTACCAGCCTGTTGTGGACTTGGTCATGCGCAGAGCTCTGGAGGA

** ****** * **** *** ** ****** * ***** * * *** * **

Gallus TGATGTAATTGATGGATATCCTGTGAAAAAGGGAACAAACATTATTCTCAACATTGGACG

Pogona TGACGTGATCGATGGCTATCCAGTGAAGAAAGGAACCAACATCATTCTGAACATTGGCCG

Anolis TGATGTGATTGATGGCTATCCGGTGAAAAAAGGCACCAACATCATTCTCAACATCGGGCG

Calotes TGATGTAATCGATGGCTACCCAGTGAAAAAGGGGACAAACATTATCCTGAATATTGGAAG

Homo TGATGTAATCGATGGCTACCCAGTGAAAAAGGGGACAAACATTATCCTGAATATTGGAAG

Mus TGACGTAATTGACGGCTACCCGGTTAAAAAGGGAACTAACATCATTCTGAACATCGGAAG

*** ** ** ** ** ** ** ** ** ** ** ** ***** ** ** ** ** ** *

Gallus CATGCACAAGCTTGAATTCTTCCCAAAACCGAATGAGTTTTCTCTTGAAAACTTTGAGAA

Pogona CATGCATAAGCTAGAGTTTTTCCCGAAACCTAATGAATTCTCCCTTGAGAATTTTGAGAA

Anolis CATGCATCGGCTTGAGTTCTTCCCAAAGCCCAATGAGTTCTCGCTCGAAAATTTTGAAAA

Calotes GATGCACAGACTCGAGTT------------------------------------------

Homo GATGCACAGACTCGAGTTTTTCCCCAAACCCAATGAATTTACTCTTGAAAATTTTGCAAA

Mus AATGCACAGGCTCGAGTACTTCCCTAAGCCCAATGAATTTACCCTTGAAAACTTTGAGAA

***** ** ** *

**2c *CvRspo1***


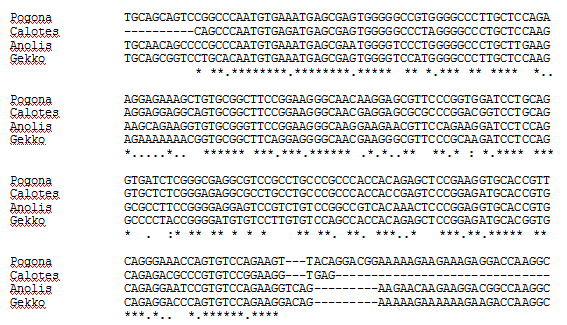


**Figure 2: Multiple sequence alignment of *CvFoxl2 (a), CvArom (b) & CvRspo1 (c)* mRNA sequence**. Sequences of *Calotes* and other vertebrates were aligned using clustalW multiple sequence alignment program. Stars (*) indicates conserved sequence. Missing nucleotide/sequences are indicated by hyphen (-).

**S Figure 3 Amino acid alignment with proteins of different vertebrates:**

**3a (*CvFoxl2*)**


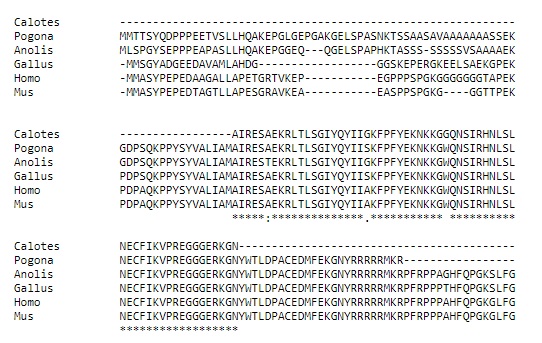


**3b (*CvArom*)**


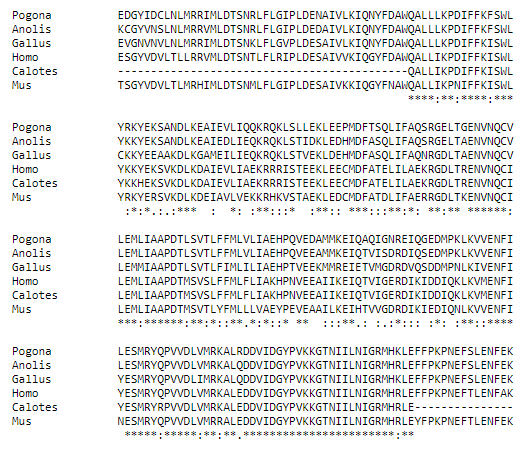


**3c (*CvRspo1*)**


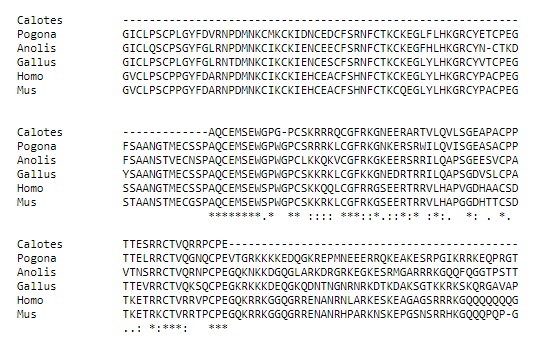


**Figure 3: Multiple sequence alignment of *CvFoxl2 (a), CvArom (b) & CvRspo1 (c)* amino acid sequence**. Sequences of *Calotes* and other vertebrates were aligned using clustalW multiple sequence alignment program. Stars (*) indicates conserved sequence. Missing nucleotide/sequences are indicated by hyphen (-).
